# Supplementary material for: Differences and influencing factors for underground water carbon uptake by karsts in Houzhai Basin, southwest China
Source: Copernicus journal article supplement (doi:10.5194/se-2016-37), 2016-03-10
Supplement: Supplementary file [file Revised Manuscript.pdf › Revised Manuscript.pdf]

# Differences and influencing factors related to underground water carbon uptake by karsts in the Houzhai Basin, southwestern China

Junyi Zhang<sup>1,2</sup>, Zihao Bian<sup>1</sup>, Minghong Dai<sup>1</sup>, Lachun Wang<sup>1\*</sup>, Weici Su<sup>3</sup>

1.School of Geographic and Oceanographic Sciences, Nanjing University, Nanjing 210023, China.

2.School of Tourism and Land Resources, Chongqing Technology and Business University, Chongqing 400067, China.

3.The Institute of Mountain Resources, Guizhou Academy of Sciences, Guiyang 550018, China.

Correspondence to: Lachun Wang (wang6312@263.net.cn)

## Abstract

The karst geological carbon sink is an important part of the global carbon sink. Consequently, accurate determination of the carbon sink of karst ecosystems has become a core issue in research. We used flow and carbon ion concentration data from three stations with different environmental background conditions in the Houzhai basin to analyze the differences in carbon uptake between stations and to determine their impact factors. The results show that carbon sink discharge was mainly controlled by the flow at each site. Preliminary analysis indicated that the rapid increase in flow only had a partial dilution effect on the ion concentrations due to the high speed and stability of chemical carbonate weathering. The Land-Use and Land-Cover Change (LUCC) type had important effects on the bicarbonate ion concentrations; if runoff was stable, the influence of flow variation on the ion concentration was lower than the effects of chemical carbonate weathering on bicarbonate ion concentrations under different environmental conditions (a comparison of Laoheitan and Liugu stations showed a difference of 150%). However, if runoff increased significantly, the impact of runoff variation on bicarbonate ions was greater than the effects of chemical carbonate weathering caused by different environmental conditions (comparison results of Laoheitan and Maoshuikeng stations). This work provides a reference for the calculation of the karst geological carbon sink.

## 1. Introduction

Global warming from the emissions of greenhouse gases has become the core issue of global environmental change. One of the most pressing concerns in the science of global climate change is the effective accounting of atmospheric CO<sub>2</sub> in the global budget (Schindler,1999;Melnikov and Neill,2006;Liu et al.,2010;Kao et al.,2014) because in order to control global warming it is necessary to control emissions of carbon dioxide through carbon capture and storage (CCS) technology. In addition to developing CCS technology, an understanding of a number of natural ecological and geological processes such as rock weathering, plant growth, and other physical, chemical, and biological processes can also improve CCS (Hoffmann et al.,2013). Carbonate

weathering in rock weathering processes is considered to be both an important source and sink of  $\text{CO}_2$  (Zeng et al.,2015;Lian et al.,2011;Liu and Zhao,2000;Serrano-Ortiz et al.,2010;James et al.,2006). Carbonate rock dissolves more easily in water in which  $\text{CO}_2$  is dissolved, and at a temperature of 15 °C and atmospheric  $\text{CO}_2$  partial pressure of 380 ppmv, the equilibrium concentration of dissolved inorganic carbon (DIC) in a water system of  $\text{CaCO}_3\text{--CO}_2\text{--H}_2\text{O}$  can reach 1231 mol/L in water with calcium carbonate (Dreybolt,1988). Moreover, karst is widely distributed around the world; it occupies approximately 11.2% of the Earth's surface and approximately 15 million  $\text{km}^2$  over the earth (Dürr et al.,2005).Therefore, carbonate is closely associated with atmospheric  $\text{CO}_2$  concentrations through carbonate weathering processes and has become an important component of the global carbon cycle. As a result, carbon uptake from chemical weathering can significantly influence the evolution of atmospheric  $[\text{CO}_2]$  in the Earth's long-term (over the past 100 million years) (Bernier et al.,1983) and short-term climate. Moreover, previous research has shown that more carbon is sequestered from carbonate weathering than from silicate rock weathering (Liu,2012). The problems associated with karst dissolved inorganic carbon (DIC) re-precipitation occur in geological time scales. Existing studies have shown that karst aquatic organisms can convert DIC into organic carbon (OC); consequently, carbonate weathering has stable carbon sink effects on a long time scale (Chen et al.,2014;Liu,2012). Moreover, the carbon sink intensity is 51 times higher than that of the ocean biological pump (Passow and Carlson,2012;Chen et al.,2014). This shows that DIC used in photosynthesis of aquatic organisms has important carbon sink effects in water. In addition, it also implies that DIC can produce stable carbon sinks in karst areas.

Consequently, it is very important to accurately estimate net carbon uptake from carbonate weathering processes. Currently, there are two main methods for calculating carbonate weathering carbon sinks. The first method uses the empirical relationship between carbon uptake rates and different lithology types and calculates weathering by determining different empirical dissolved constants, such as  $0.0294 \text{ g C mm}^{-1}$  and  $0.0383 \text{ g C mm}^{-1}$  estimated by (Amiotte-Suchet and Probst,1993) and (Bluth and Kump,1994), respectively. The other method estimates carbon sinks using observations of river chemistry such as karst water flow and concentrations of bicarbonate. Nevertheless, there are always some differences between the results of the two calculation methods (Yan et al.,2011).

The karst carbon sink is influenced by different factors, such as vegetation type, temperature and aquatic microorganisms (Hagedorn and Cartwright,2009). Existing studies show that the carbon sink can differ by more than 14% under different land cover types (Table 1) (Qin et al.,2011). There was a significant correlation between temperature and the  $\text{CO}_2$  concentration in 20- and 50-cm deep soil layers in the Wangpai mountain of the Maolan conservation area (Wan,1995), and the mechanism and intensity of soil  $\text{CO}_2$  were closely related to the habitat of the soil. However, there was no significant correlation between temperature change and carbon sink flux (Yu et al.,2015). This may have occurred because the temporal resolution effects did not

match those of the temperature and carbon sink changes or changes in the "biological pump" of aquatic organisms caused by changes in light and temperature. There was a significant correlation between the biomass of aquatic organisms and their DIC utilization, and the change in  $\delta^{13}\text{DIC}$  in a few submerged plant environments was much smaller than the large number of submerged plant growth environments. However, the change in  $\delta^{13}\text{DIC}$  was mainly influenced by changes in the metabolism of aquatic plants during the day and at night (Chen et al.,2014).

Karst is widely distributed in China, which has approximately 3.44 million  $\text{km}^2$  of karst area, including buried, covered, and exposed carbonate rock areas (Jiang et al.,2014), and about 0.4 million  $\text{km}^2$  of karst is located in southwestern China (Jiang and Yuan,1999).The most frequently used calculation method for carbon sequestration is the forward method (Zhang,2011) and in China's karst regions, the river chemistry method. However, there are some defects in the forward method because physical models cannot truly reflect the in situ karstification and carbon migration process (Kang et al.,2011); consequently, the river chemistry method is more frequently adopted (Zhao et al.,2010;Yan et al.,2012;Zhang et al.,2015;Huang et al.,2015). There are large discrepancies in the estimates of carbon sequestration in China, ranging from 5  $\text{Tg Cyr}^{-1}$ (Jiang and Yuan,1999) to 12  $\text{Tg Cyr}^{-1}$ (Yan et al.,2011) and 18  $\text{Tg Cyr}^{-1}$ (Liu and Zhao,2000). These values are usually derived from the observed carbon discharge from a single water chemical observatory in a single basin in southwestern China; however, there may be some deviations in the results of this single observation site because of the high heterogeneity of the karst system, the sensitivity of the response to external environment changes, and the interference of human activity, which is usually intensified in karst regions. Studies have shown that carbonate weathering is sensitive to ecosystem dynamics, which means that carbonate weathering and associated  $\text{CO}_2$  consumption discharges quickly react to any global changes or land use modifications (Calmels et al.,2014).Therefore, in this study, we used flow and carbon ion concentration data from three observation stations with different environmental background conditions in the same karst groundwater basin in order to analyze the differences in carbon uptake between stations and their impact factors. This work also provides a reference for improving the calculation accuracy of the karst geological carbon sink.

Table 1 The proportion of different land cover types and characteristics of underground river chemicals in the Dagou River

| Region                       | Forest land (%) | Arable land (%) | Bare Rock (%) | Barren land (%) | $\text{HCO}_3^-$ (mg/L) | $\text{PCO}_2$ (Pa) | Carbon sink ( $\text{t C/km}^2 \text{ a}$ ) |
|------------------------------|-----------------|-----------------|---------------|-----------------|-------------------------|---------------------|---------------------------------------------|
| The west bank of Dagou River | 56.13           | 15.15           | 14.1          | 10.98           | 233.71                  | 909.46              | 45.67                                       |
| The east bank of Dagou River | 20.8            | 12.95           | 29.57         | 25.95           | 177.26                  | 257.37              | 40.12                                       |

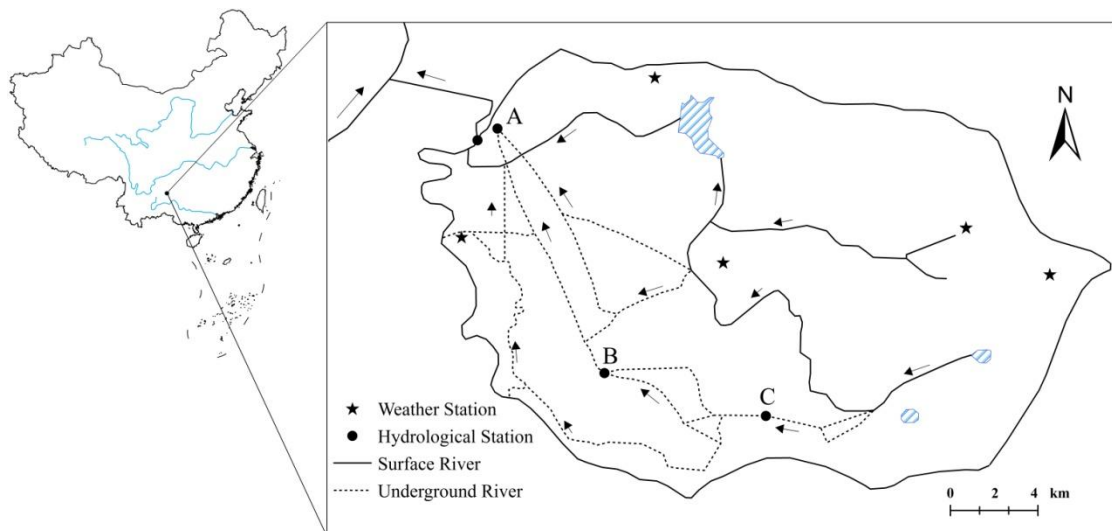

Figure 1. The distribution of drainage systems and weather hydrological stations.

## 2. Materials and methods

### 2.1. Study Area

Houzhai basin is located in Puding county in the middle of Guizhou province ( $26^{\circ}13' - 26^{\circ}15' \text{ N}$ ,  $105^{\circ}41' - 105^{\circ}43' \text{ E}$ ). The total area of the basin is  $80.65 \text{ km}^2$ , and the length of the main river is approximately 12 km (including the ground and underground river) (Figure 1). The southeastern portion of the basin is lower than the northwestern portion. The relative elevation of the basin is approximately 150 m, and its average altitude is 1250 m. A typical hoodoo depression physiognomy is distributed in the east of the basin where the main land-use type is forest vegetation, while karst is distributed in the west of the basin where the main land-use type is farmland. The area has a subtropical humid climate; the average rainfall is 1316.8 mm and the average temperature is  $15.5^{\circ} \text{ C}$ . The wet season occurs from May to October and the dry season from November to April. Precipitation during the wet season accounts for more than 80% of annual rainfall. Bedrock in the basin is composed of mainly carbonate rock formed during the Triassic. As a result of lithology and geological structure, karstification is strong, and karst formation is widely developed in the basin. Hydrological runoff processes are significantly influenced by the karst underground space (gap and pipe) and its distribution characteristics. There is no obvious surface river valley upstream, and although there is a river valley midstream and downstream, seasonal runoff only appears temporarily, and leakage pits are arranged along the riverbed.

### 2.2. Data Sources and Methods

#### 2.2.1. Data Sources

The main data were derived from three groundwater hydrology and water quality monitoring stations: A (Maoshuikeng MSK), B (Liugu LG), and C (Laoheitan LHT) (Figure1). The three stations are located in the upstream, midstream and downstream reaches of the basin, respectively. The LHT station is located on the edge of the peak cluster depression, the LG station is located in

the region of the peak cluster basin, and the control areas of the two stations are 24.06 km<sup>2</sup> and 15.81 km<sup>2</sup>, respectively (Wang et al.,2010). The MSK station is located at the outlet of the underground river, and its control area is 80.56 km<sup>2</sup> (Figure1). We selected continuous and complete data, which contain average daily flow data and  $HCO_3^-$  concentration data from the MSK station (1996-2001), LG station (1992-1996), and LHT station (1988-2002). The average annual temperatures from 1988-2002 were provided by the Puding station, which is located at the boundary of the basin. Concentration data were measured directly by the water sampling station. Water samples were collected from the underground rivers at a water depth of 0.6 m at the exit, 6 times per month in the wet season (May to October) and 3 times per month in the dry season (November to April of the following year), and water samples were measured for pH using a portable meter. The water temperature and concentration of bicarbonate ( $[HCO_3^-]$ ) were determined by titration with standard hydrochloric acid (HCl) immediately after samples were collected at the sampling site.

### 2.2.2. Determination of Water Samples and DIC Method

Bicarbonate concentration was measured using a neutralization titration method. The steps of the method are as follows: (1) Add a sample to a 100-ml beaker and drip 4 drops of phenol red indicator and then shake the sample well; (2) Titrate the sample using standard HCl (0.025 mol/L) until the red color disappears at a pH of 8.4 and record the standard HCL usage quantity as  $V_1$ ; (3) Drip three drops of methyl orange indicator into the sample and shake well, then titrate using standard HCl until the color of the sample changes to orange at a pH of 4.4, and record the HCl usage quantity ( $V_2$ ); and (4) Finally, measure the concentration of carbonate ions in the water samples by using formula (1):

$$\rho = \frac{(V_2 - V_1) \times c \times 61.017 \times 1000}{V} \quad (1)$$

The flow discharge data of each station were converted from the water level using a stage-discharge curve. The discharge monitoring frequency was twice a day, with eight points in the AM and eight points in the PM, and the average value of the two time periods was calculated as the discharge data for one day.

In a karst environment, carbon dioxide dissolves in water and undergoes a reversible chemical process (2) with calcium carbonate:

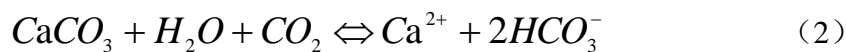

Under a steady state, the quantity of carbon dioxide dissolved in karst water is equal to the discharge of CO<sub>2</sub> from the atmosphere. That discharge in a g C m<sup>-2</sup> time step<sup>-1</sup> is calculated according to the following formula (3) (Yan et al.,2011;Amiotte-Suchet and Probst,1993):

$$F = \frac{1}{2}cq \frac{M_c}{M_{HCO_3}} \quad (3)$$

where  $c$  is the concentration of bicarbonate ions ( $\text{g/m}^3$ );  $q$  is the production flow ( $\text{m}^3/\text{time step}$ );  $M_C$  and  $M_{HCO_3}$  are the molecular weights of  $C$  and  $HCO_3^-$ , respectively, and  $1/2$  indicates that 1 mol of bicarbonate needs only half a mole of  $CO_2$  from the soil or atmosphere. Additionally, karst water is generally alkaline. The content of  $CO_3^{2-}$   $C$  in dissolved inorganic  $C$  is very small, so we did not need to consider it in the DIC calculation (Yan et al., 2011; Gelbrecht et al., 1998). In this study, we used the formula  $F_1$  below to calculate net carbon uptake by karst, using the estimates of mean annual  $[HCO_3^-]$ , ion concentration during the dry-wet season, and the mean daily underground flow discharge.

$$F_1 = \frac{1}{2} \cdot \frac{M_c}{M_{HCO_3}} \cdot \bar{c} \cdot \sum_{n=1}^{12} q_n \quad (4)$$

where  $\bar{c}$  is either the annual average bicarbonate density or the ion concentration in the dry-wet season ( $\text{mg/L}$ ), and  $q$  is the average daily discharge ( $\text{m}^3/\text{s}$ ,  $n=365$  day).

### 3. Results

#### 3.1. Dry -Wet Seasonal and Inter-annual Variations in Ion Concentration and Discharge

There was a negative correlation between ion concentration and discharge (Figures 2, 3, and 4). For each site during the study period, the ion concentration in the wet season was slightly lower than in the dry season. The LHT station, which had the longest study period, exhibited the highest and lowest values for bicarbonate ion concentration (Table 2), and the difference in the ion concentration between wet season and dry season was not significant. The flow, ion concentration and carbon flux data of 2001 from LHT were lacking, and we therefore replaced them with the 2002 data in the paper.

Table 2 The highest and lowest ion concentration in the wet season, dry season and throughout the whole year for the LHT station 1988-2002

|        | LHT ion concentration (mg/L) |        |        |         |        |       |         |        |
|--------|------------------------------|--------|--------|---------|--------|-------|---------|--------|
|        | highest                      | lowest |        | highest | lowest |       | highest | lowest |
| wet    | 240.5                        | 201.7  | dry    | 259.6   | 234.7  | whole | 248.3   | 218.8  |
| season | (1994)                       | (1999) | season | (2002)  | (1991) | year  | (1994)  | (1999) |

The annual average ion concentrations recorded at the LG station were more stable than those from the LHT station. From 1992-1996, the annual average concentration of bicarbonate ions in the wet season, dry season, and whole year were 222.0 mg/L, 253.5 mg/L, and 237.8 mg/L, respectively at the LG station and 228.8 mg/L, 249.3 mg/L, and 239.1 mg/L, respectively at the LHT station. However, there was little difference in ion concentration between the two stations when considering the stability of ion concentration changes (Table 3).

The differences in ion concentrations across the site as a whole were small. The annual average ion concentrations measured at the MSK station were more stable than those at the LHT station with respect to the standard deviation of the ion concentration (Table 3). During the same period, i.e., from 1996-2001, the annual average ion concentrations in the wet season, dry season, and whole year were 217.8 mg/L, 247.4 mg/L, and 232.6 mg/L, respectively, for the LHT station, and 209.9 mg/L, 226.4 mg/L, and 218.2 mg/L, respectively, for the MSK station. The difference in ion concentrations between LHT and LG was smaller than that between LHT and MSK.

The flow in the wet season was significantly greater than in the dry season. The discharge from the MSK station, which is located at the outlet of the underground river basin, was larger than the discharge from LG and LHT. From 1996-2001, the annual average flow values of MSK in the wet season, dry season, and whole year were 1.55 m<sup>3</sup>/s, 0.67 m<sup>3</sup>/s, and 1.11 m<sup>3</sup>/s, respectively, and the flow in the wet season was significantly greater than in the dry season. The LG and LHT flows in the rainy and dry seasons exhibited the same trend (Figure 2, 3, and 4). From Table 3, we can determine the stability of flow as follows: MSK>LG>LHT.

Table 3. Standard deviation of production flow, ion concentration, and carbon sink for each station in the dry and wet seasons and over the whole year

| Station     | Water Discharge Rate (m <sup>3</sup> /s) |       |       | Bicarbonate Concentration (mg/L) |      |      | Carbon uptake (g C yr <sup>-1</sup> ) |      |      |
|-------------|------------------------------------------|-------|-------|----------------------------------|------|------|---------------------------------------|------|------|
|             | wet                                      | dry   | year  | wet                              | dry  | year | wet                                   | dry  | year |
| Maoshuikeng | 0.108                                    | 0.109 | 0.060 | 6.46                             | 6.64 | 5.26 | 1.12                                  | 0.84 | 0.43 |
| Liugu       | 0.109                                    | 0.015 | 0.051 | 10.64                            | 4.81 | 4.99 | 2.93                                  | 0.45 | 1.54 |
| Laoheitan   | 0.073                                    | 0.061 | 0.045 | 10.04                            | 8.41 | 7.55 | 3.34                                  | 1.84 | 2.05 |

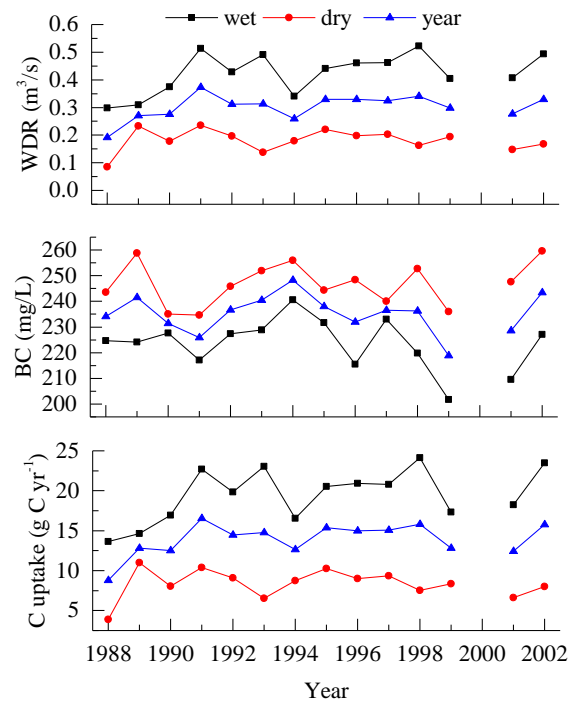

Figure 2. Variation in runoff, ion concentration, and carbon sink for the LHT station (1988-2002).

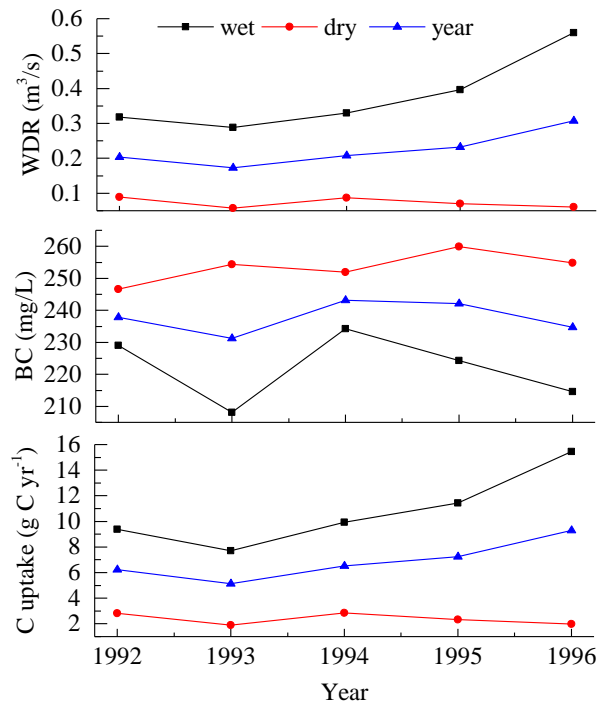

Figure 3. Variation in runoff, ion concentration, and carbon sink for the LG station (1992-1996)



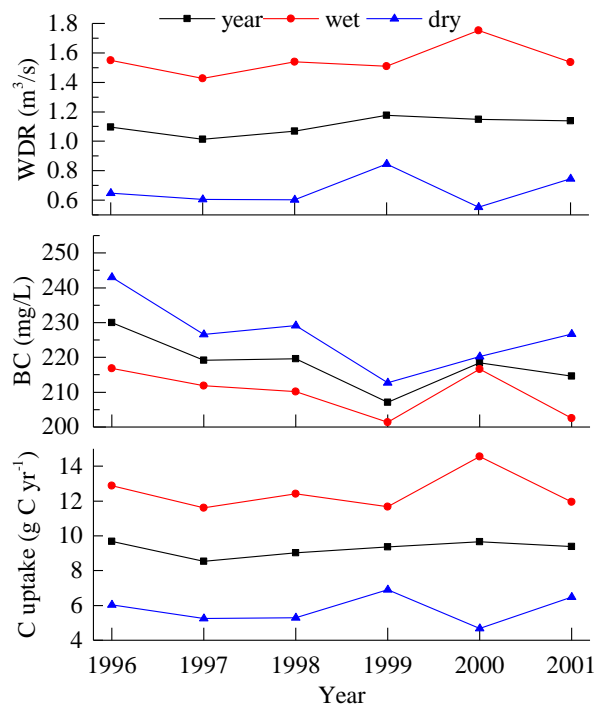

Figure 4. Variation in runoff, ion concentration, and carbon sink for the MSK station (1996-2001).

### 3.2. Dry and Wet Seasonal and Inter-annual Variations in Carbon Uptake Rate

There was a significantly greater discharge in the wet season compared to the dry season. From 1996-2001 at the MSK station, the annual average carbon sink discharges of underground water in the wet season, dry season, and whole year were  $12.51$ ,  $5.78$ , and  $9.28 \text{ g C/m}^2 \cdot \text{yr}^{-1}$ , respectively ~~with a significantly greater net discharge in the wet season compared to the dry season~~. From 1992-1996 at the LG station, the annual average carbon sink discharges in the wet season, dry season, and whole year were  $10.78$ ,  $2.38$ , and  $6.89 \text{ g C/m}^2 \cdot \text{yr}^{-1}$ , respectively. From 1988-2002 at the LHT station, the annual average carbon sink discharges in the wet season, dry season, and whole year were  $19.48$ ,  $8.34$ , and  $13.91 \text{ g C/m}^2 \cdot \text{yr}^{-1}$ , respectively, i.e., greater than both the LG and MSK stations (Figure 6). From 1996-2002 at the LHT station, the annual average net carbon sink discharges in the wet season, dry season, and whole year were  $20.82$ ,  $8.14$ , and  $14.48 \text{ g C/m}^2 \cdot \text{yr}^{-1}$ , respectively, while from 1992-1996 the respective values were  $20.18$ ,  $8.72$ , and  $14.45 \text{ g C/m}^2 \cdot \text{yr}^{-1}$ . Comparing the results for the same period, the annual carbon sink discharge in the wet season, dry season, and whole year for the LHT station was greater than that for the MSK and LG stations. However, with respect to the stability of the carbon discharge (Table 3), MSK was the most stable in the wet season while LG was the most stable in the dry season.

## 4. Discussion

### 4.1. Flow and Ion Concentration Change and their Effects on Carbon Sink

The trends in annual runoff among sites are consistent with the carbon sink discharge but differ from the trends of the bicarbonate ions (figure 2, 3, 4). This suggests that the effect of flow change on the carbon sink was greater than on the ion concentration. The flow in the wet season

was consistent with the flow trend for the whole year. This is a result of the monsoon climate where wet season precipitation levels are significantly higher than in the dry season, due to less rainfall in the dry season when the runoff is mainly supplied by soil water and fissure/pore water. Therefore, the composition of underground karst aquifer medium structures has important effects on the dry season flow. According to changes in ion concentrations in the wet season, dry season, and whole year (figure 2, 3, and 4), flow correlated negatively with the carbon ion concentration, but if there was a significant difference between the flow in the wet season and in the dry season, the bicarbonate ion concentrations would not decrease when the flow increased rapidly.

Although the ion concentrations were higher in the dry season than in the wet season, the differences were small. When there was little change in flow, the effect of flow increase on the ion concentration dilution was smaller than the environmental effects of chemical carbonate weathering. Contrasts were made between each site: from 1992-1996, the annual average carbon ion concentration was 237.8 mg/L for the LG station and 239.1 mg/L for the LHT station. The annual average flow of the LHT station was 1.37 times that of the LG station, but the ion concentration did not decline significantly due to the increase in flow. The basin area controlled by the LHT station is characterized by peaks and valleys, which have good vegetation cover that recovers rapidly. Previous studies have shown that the concentration of  $\text{HCO}_3^-$  is vulnerable to LUCC and other environmental changes (Zhao et al.,2010;Lan et al.,2015). In particular, the rapid recovery of vegetation can significantly promote the dissolution of carbonate and thus increase the bicarbonate ion concentration in karst groundwater (Berner,1997;Liu et al.,2010).

The flow only had a partial dilution effect on the ion concentration, and the results were not multiplicative. That is to say, carbonate weathering was significantly affected by factors other than flow. This also implies that the bicarbonate ion concentrations in the karst underground water may have a relatively stable extremum under stable environmental conditions. From 1996-2001, the annual average carbon ion concentrations at the LHT and MSK stations were 232.6 mg/L and 218.2 mg/L, respectively, but the average annual flow at LHT was only 0.32 m<sup>3</sup>/s, while MSK exhibited an annual flow of 1.11 m<sup>3</sup>/s, i.e., 3.47-fold higher. Similarly, the ion concentration did not decline significantly as a result of the increase in flow. The MSK station is located at the edge of a paddy field, which has thicker soil coverage, and the underground rivers have more biological carbon sources that could produce more  $\text{HCO}_3^-$  in the ground water compared to LHT. The effect of the flow increase on the ion concentration dilution exceeded the environmental effects of carbonate weathering at the LHT and MSK stations.

In addition, although studies have shown that under stable LUCC conditions, the strength of the carbon sink from rock weathering will depend on the climate (e.g. temperature,) (Hagedorn and Cartwright,2009;Gislason et al.,2009;Tipper et al.,2006), the annual average carbon sink trend for the LHT station, which had the longest study period (1988-2002), differed significantly from

the annual average temperature trend. However, this may be a result of time resolution limitations of the data.

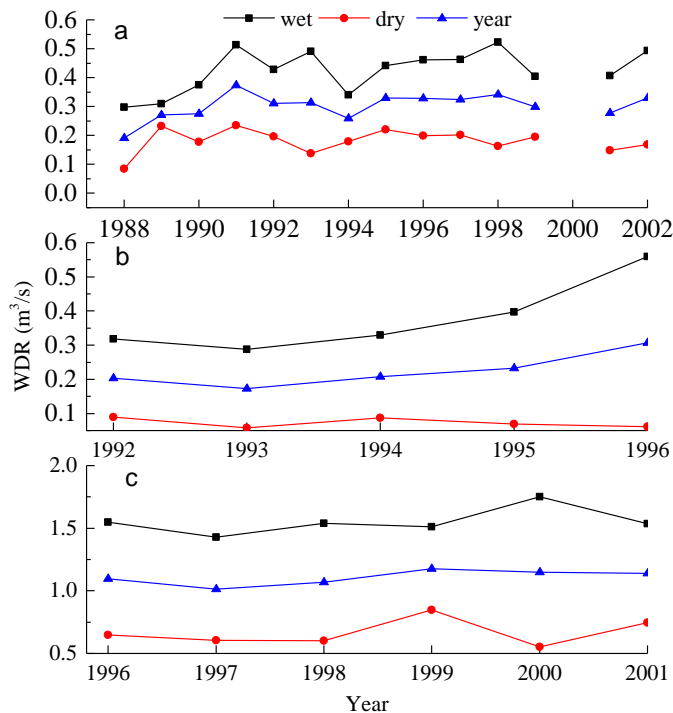

Figure 5. Variation in flow among sites in the wet season, dry season, and whole year during the study period (a. LHT; b. LG; c. MSK).

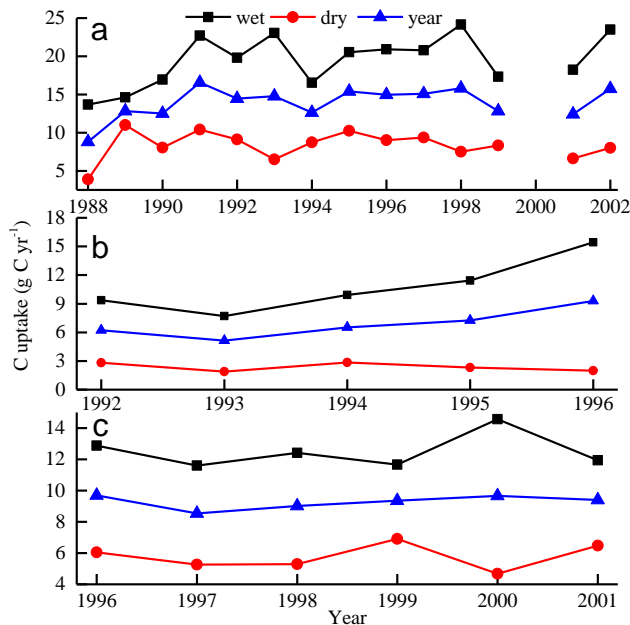

Figure 6. Variation in net carbon discharge among sites in the wet season, dry season, and whole year during the study period.

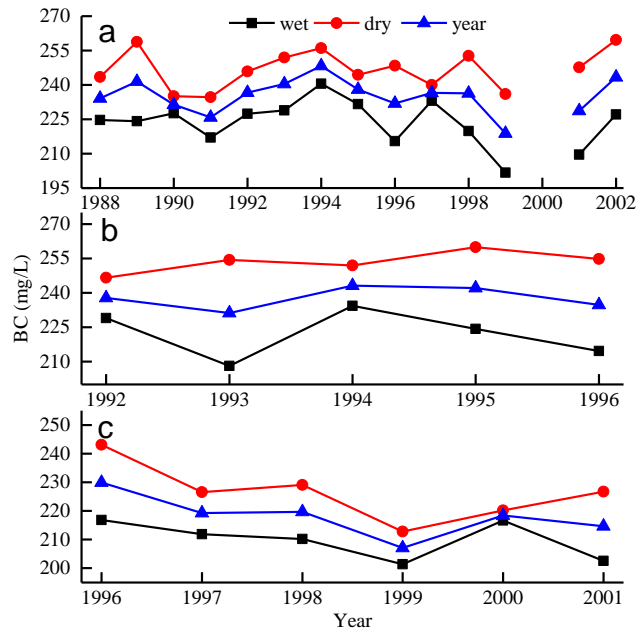

Figure 7. Variation in bicarbonate ion concentrations among sites in the wet season, dry season, and whole year during the study period.

#### 4.2. Variation in Carbon Sink Discharge for Each Site

The karst carbon sink changed significantly with the seasons, exhibiting striking seasonal patterns. The carbon sink discharge for each site in the wet season was greater than the dry season and the annual average, while the carbon sink discharge in the dry season was lower than the annual average (figure 6). The reason for this is that the considerable summer rainfall runoff significantly increased the amount of carbon sink discharge in the wet season.

The difference in carbon sink discharges between the LHT and LG stations resulted from differences in flow. During the same period, the carbon sink values for the LHT station (wet season, dry season, and whole year) were greater than those for LG stations (figure 6). From 1992-1996, the flow for LG in the wet and dry seasons was lower than for LHT (figure 5), but the annual average bicarbonate concentration of LG was 237.8 mg/L, slightly less than LHT (239.1 mg/L) (figure 7). Different LUCC types may further increase differences in carbon sink discharge between two stations. The LHT control basin station is surrounded mainly by forest vegetation while the LG control basin is surrounded mainly by dry farmland.

From 1996-2001, the carbon sink for the LHT station in the dry and wet seasons and whole year was greater than for the MSK station (figure 6). The annual average concentration for LHT (232.6 mg/L) was greater than for MSK (218.2 mg/L), while the runoff was significantly greater for MSK than for LHT (figure 7). We hypothesize the above results are caused by two main reasons as follows: On the one hand, the fact that the carbon sink for MSK was less than that for LHT might be linked to the water conveyance distance and LUCC type of the control area. The carbon sink for MSK, which is the groundwater outlet for the whole basin, was influenced by the

landform and LUCC type of the entire river basin. Existing research has shown that karst erosion rates under soil vary significantly for different LUCC types in karst watersheds, and the averages for cultivated land, thickets, secondary forests, grassland, and forest were found to be 4.02, 7.0, 40.0, 20.0 and 63.5 t km<sup>2</sup> a<sup>-1</sup>, respectively (Zhang,2011), among which the cultivated land value was the lowest (Yan et al.,2014).Vegetation can increase the speed of rock weathering by 3–10-fold (Berner,1997). According to monitoring data from Guilin province in China, vegetation restoration resulted in a 266% increase in the average annual concentration of soil CO<sub>2</sub> over 10 years. Research in the Houzhai valley has shown that forest recovery causes more carbon dioxide (CO<sub>2</sub>) to be dissolved in karst water (Yan et al.,2014), and karst hydro-geochemistry and the karst-related carbon cycle could be regulated effectively by different LUCC types (Zhao et al.,2010).

On the other hand, in the process of underground runoff converging at the outlet (MSK station), much of the water flows into the surface river and across the thick soil of paddy fields, but our calculation only considered carbonate weathering carbon sinks (water - rock - gas interaction), which may have affected the results. Research has shown that dissolved inorganic carbon is used in aquatic photosynthesis for the synthesis of organic carbon (Waterson and Canuel,2008;Tao et al.,2009). In addition, the precipitation recharge coefficients of MSK, LG and LHT were 0.485 and 0.503, respectively (Chen et al.,2014). The difference in the precipitation recharge coefficient for the basin determines the groundwater quantity, under the same rainfall conditions, and the development degree of the underground pipe network also influences the water-rock contact time. Differences in surface and ground water proportions controlled by geological landforms could also affect the calculation results.

## 5. Conclusion and Suggestions

Through contrast analysis based on three stations located upstream, midstream and downstream of the Houzhai basin, we analyzed the reasons for the differences in flow, bicarbonate ion concentrations and carbon sink discharge. The preliminary conclusions are as follows: (1) The carbon sink discharge was mainly controlled by the flow of each site, and LUCC type had important effects on the bicarbonate ion concentrations at each site. (2) The large difference in flow among sites did not lead to significant differences in bicarbonate ion concentrations between the sites, showing that the rapid increase in flow only had a partial dilution effect on the ion concentrations. Due to the high speed and stability of chemical carbonate weathering, the bicarbonate ion concentrations did not change significantly, and thus did not affect the carbon sink discharge. (3) For different LUCC conditions, if the runoff is stable, the influence of flow variation on ion concentration will be less than the effects of chemical carbonate weathering on bicarbonate ion concentrations caused by different environmental conditions (a comparison of LHT and LG showed a difference of 150%). However, if runoff increases significantly, the impact

of runoff variation on bicarbonate ions will be greater than the effects of chemical carbonate weathering caused by different environmental conditions (comparison results of LHT and MSK).

In summary, the calculation results for carbon sink discharge from karstification using watershed monitoring data in areas restricted to a dominant single LUCC type may differ in a small watershed where geomorphology, hydrology, and land use cover are different. This is one of the reasons why there is such a large deviation in China's total carbon sink discharge estimated using carbon sink data from a single watershed in a karst region. In future research, considering the diversity of landform types and surface covers in the southwestern karst area, it is important to develop a monitoring network in different topographical and surface cover regions, using a variety of monitoring technologies to improve the accuracy of karst carbon sink estimates.

In addition, we cannot properly quantify the impact of vegetation and other factors on the karst carbon sink in the research basin because the data used in the study do not have a high temporal resolution. At the same time, the data failed to provide a quantitative conclusion. However, based on the purpose of this paper, the existing data can meet the needs of the analysis, so as to draw a qualitative research conclusion. From the point of view of research and development in the future, high temporal resolution monitoring using automatic monitoring equipment should be the basis for quantitative studies on vegetation and other factors that impact the karst carbon sink; this may help to reduce uncertainty error and is our main research direction for the future.

## References:

- Amiotte-Suchet, P. and Probst, J.: CO<sub>2</sub> flux consumed by chemical-weathering of continents-influences of drainage and lithology, *Comptes Rendus De L Academie Des Sciences Serie II*, 317, 615-622, 1993.
- Berner, R. A.: The Rise of Plants and Their Effect on Weathering and Atmospheric CO<sub>2</sub>, *Science*, 276, 544-546, doi: 10.1126/science.276.5312.544, 1997.
- Berner, R. ,Lasaga, A. and Garrels, R.: The carbonate-silicate geochemical cycle and its effect on atmospheric carbon dioxide over the past 100 million years, *American Journal of Science*, 283, 641-683, doi: 10.2475/ajs.283.7.641, 1983.
- Bluth, G. J. S. and Kump, L. R.: Lithologic and climatologic controls of river chemistry, *Geochimica et Cosmochimica Acta*, 58, 2341 – 2359, doi: 10.1016/0016-7037(94)90015-9, 1994.
- Calmels, D. ,Gaillardet, J. and François, L.: Sensitivity of carbonate weathering to soil CO<sub>2</sub> production by biological activity along a temperate climate transect, *Chemical Geology*, 390, 74-86, doi: 10.1016/j.chemgeo.2014.10.010, 2014.
- Chen, B. ,Yang, R. ,Liu, Z. ,Yan, H. and Zhao, M.: Effects of aquatic phototrophs on diurnal hydrochemical and <sup>13</sup>C DIC variations in an epikarst spring and two spring-fed ponds of Laqiao, Maolan, SW China, *Geochimica*, 43, 375-385, 2014.
- Chen, X. ,Zhang, Z. and Rong, L. (Eds.): Water cycle process and its eco-hydrological effect of karsts areas in southwest of China, Science Press, Beijing, 2014.

389 Dreybolt, W. (Ed.): Processes in karst systems, Springer-Verlag, Berlin, 1988.

390 Dür, H. H. ,Meybeck, M. and Dür, S. H.: Lithologic composition of the Earth's continental surfaces  
391 derived from a new digital map emphasizing riverine material transfer, Global Biogeochemical Cycles,  
392 19, n/a-n/a, doi: 10.1029/2005GB002515, 2005.

393 Gelbrecht, J. ,Fait, M. ,Dittrich, M. and Steinberg, C.: Use of GC and equilibrium calculations of CO<sub>2</sub>  
394 saturation index to indicate whether freshwater bodies in north-eastern Germany are net sources or  
395 sinks for atmospheric CO<sub>2</sub>, Fresenius' Journal of Analytical Chemistry, 361, 47-53, doi:  
396 10.1007/s002160050832, 1998.

397 Gislason, S. R. ,Oelkers, E. H. ,Eiriksdottir, E. S. ,Kardjilov, M. I. ,Gisladottir, G. ,Sigfusson,  
398 B. ,Snorrason, A. ,Elefsen, S. ,Hardardottir, J. ,Torssander, P. and Oskarsson, N.: Direct evidence of  
399 the feedback between climate and weathering, Earth and Planetary Science Letters, 277, 213-222, doi:  
400 10.1016/j.epsl.2008.10.018, 2009.

401 Hagedorn, B. and Cartwright, I.: Climatic and lithologic controls on the temporal and spatial variability  
402 of CO<sub>2</sub> consumption via chemical weathering: An example from the Australian Victorian Alps,  
403 Chemical Geology, 260, 234-253, doi: 10.1016/j.chemgeo.2008.12.019, 2009.

404 Hoffmann, T. ,Mudd, S. M. ,Van Oost, K. ,Verstraeten, G. ,Erkens, G. ,Lang, A. ,Middelkoop,  
405 H. ,Boyle, J. ,Kaplan, J. O. and Willenbring, J.: Short Communication: Humans and the missing C-sink:  
406 erosion and burial of soil carbon through time, Earth Surface Dynamics, 1, 45, 2013.

407 Huang, F. ,Zhang, C. ,Xie, Y. ,Li, L. and Cao, J.: Inorganic carbon flux and its source in the karst  
408 catchment of Maocun, Guilin, China, Environmental Earth Sciences, 74, 1079-1089, doi:  
409 10.1007/s12665-015-4478-4, 2015.

410 James, U. L. ,Baldini, L. M. ,Baldini, F. M. and Clipson, N.: Carbon dioxide sources, sinks, and spatial  
411 variability in shallow temperate zone caves: evidence from Ballynamintra Cave, Ireland, Journal of  
412 Cave and Karst Studies, 68, 4-11, 2006.

413 Jiang, Z. C. ,Lian, Y. Q. and Qin, X. Q.: Rocky desertification in Southwest China: Impacts, causes,  
414 and restoration, Earth-Science Reviews, 132, 1-12, doi: 10.1016/j.earscirev.2014.01.005, 2014.

415 Jiang, Z. C. and Yuan, D. X.: CO<sub>2</sub> source-sink in karst processes in karst areas of China, Episodes, 21,  
416 33-35, 1999.

417 Kang, Z. ,Yuan, D. ,Chang, Y. ,Li, Q. ,He, S. ,Yan, Y. and Xiong, Z.: The Main Controlling Factor of  
418 Karst Carbon Sequestration: About Water Cycle, Journal of Jilin University(Earth Science Edition), 41,  
419 1542-1547, 2011.

420 Kao, S. J. ,Hilton, R. G. ,Selvaraj, K. ,Dai, M. ,Zehetner, F. ,Huang, J. C. ,Hsu, S. C. ,Sparkes, R. ,Liu,  
421 J. T. and Lee, T. Y.: Preservation of terrestrial organic carbon in marine sediments offshore Taiwan:  
422 mountain building and atmospheric carbon dioxide sequestration, Earth Surface Dynamics, 2, 127,  
423 2014.

424 Lan, F. ,Qin, X. ,Jiang, Z. ,Meng, R. ,Mo, R. ,Yang, S. ,Wang, W. and An, S.: Influences of Land  
425 Use/Land Cover on Hydrogeochemical Indexes of Karst Groundwater in the Dagouhe Basin,  
426 Southwest China, Clean – Soil, Air, Water, 43, 683-689, doi: 10.1002/clen.201300872, 2015.

427 Lian, B. ,Yuan, D. X. and Liu, Z. H.: Effect of microbes on karstification in karst ecosystems, Chinese  
428 Science Bulletin, 56, 2158-2161, 2011.

429 Liu, L. ,Shu, L. ,Chen, X. and Oromo, T.: The hydrologic function and behavior of the Houzhai  
430 underground river basin, Guizhou Province, southwestern China, Hydrogeology Journal, 18, 509-518,  
431 doi: 10.1007/s10040-009-0518-z, 2010.

432 Liu, Y. ,Liu, Z. ,Zhang, J. ,He, Y. and Sun, H.: Experimental study on the utilization of DIC by

433 Oocystis solitaria Wittr and its influence on the precipitation of calcium carbonate in karst and  
 434 non-karst waters, *Carbonates and Evaporites*, 25, 21-26, doi: 10.1007/s13146-009-0002-9, 2010.  
 435 Liu, Z.: New progress and prospects in the study of rock-weathering-related carbon sinks, *Chinese*  
 436 *Science Bulletin*, 57, 95-102, 2012.  
 437 Liu, Z. and Zhao, J.: Contribution of carbonate rock weathering to the atmospheric CO<sub>2</sub> sink,  
 438 *Environmental Geology*, 33, 1053-1058  
 439 , doi: 10.1007/s002549900072, 2000.  
 440 Melnikov, N. B. and Neill, B. C. O.: Learning about the carbon cycle from global budget data,  
 441 *Geophysical Research Letters*, 33, doi: 10.1029/2005GL023935, 2006.  
 442 Passow, U. and Carlson, C. A.: The biological pump in a high CO<sub>2</sub> in world, *Marine Ecology Progress*  
 443 *Series*, 470, 249-271, doi: 10.3354/meps09985, 2012.  
 444 Qin, X. ,Meng, R. and Mo, R.: Influence of land covers on carbon sink of underground river: A case in  
 445 the Dagouhe Basin in Guangxi, *Carsologica Sinica* , 30, 372-378, doi:  
 446 10.3969/j.issn.1001-4810.2011.04.004, 2011.  
 447 Schindler, D. W.: The mysterious missing sink, *Nature*, 398, 105-107, doi: 10.1038/18111, 1999.  
 448 Serrano-Ortiz, P. ,Roland, M. ,Sanchez-Moral, S. ,Janssens, I. A. ,Domingo, F. ,Godd  is, Y. and  
 449 Kowalski, A. S.: Hidden, abiotic CO<sub>2</sub> flows and gaseous reservoirs in the terrestrial carbon cycle:  
 450 Review and perspectives, *Agricultural and Forest Meteorology*, 150, 321-329, doi:  
 451 10.1016/j.agrformet.2010.01.002, 2010.  
 452 Tao, F. X. ,Liu, C. Q. and Li, S. L.: Source and flux of POC in two subtropical karstic tributaries with  
 453 contrasting land use practice in the Yangtze River Basin, *Applied Geochemistry*, 24, 2102-2112, doi:  
 454 10.1016/j.apgeochem.2009.08.007, 2009.  
 455 Tipper, E. T. ,Bickle, M. J. ,Galy, A. ,West, A. J. ,Pomi  s, C. and Chapman, H. J.: The short term  
 456 climatic sensitivity of carbonate and silicate weathering fluxes: Insight from seasonal variations in river  
 457 chemistry, *Geochimica et Cosmochimica Acta*, 70, 2737-2754, doi: 10.1016/j.gca.2006.03.005, 2006.  
 458 Wan, G. (Ed.):Carbonate and environment (Volume 1),Seismological Press,Beijing, 1995.  
 459 Wang, L. ,Meng, H. ,Zhang, Z. and Wang, D. (Eds.):Study on the hydrology and water resources of the  
 460 typical karst basin in Guizhou,Science Press,Beijing, 2010.  
 461 Waterson, E. J. and Canuel, E. A.: Sources of sedimentary organic matter in the Mississippi River and  
 462 adjacent Gulf of Mexico as revealed by lipid biomarker and  $\delta^{13}\text{C}_{\text{TOC}}$  analyses, *Organic*  
 463 *Geochemistry*, 39, 422-439, doi: 10.1016/j.orggeochem.2008.01.011, 2008.  
 464 Yan, J. ,Li, J. ,Ye, Q. and Li, K.: Concentrations and exports of solutes from surface runoff in Houzhai  
 465 Karst Basin, southwest China, *Chemical Geology*, 304-305, 1-9, doi: 10.1016/j.chemgeo.2012.02.003,  
 466 2012.  
 467 Yan, J. ,Wang, W. ,Zhou, C. ,Li, K. and Wang, S.: Responses of water yield and dissolved inorganic  
 468 carbon export to forest recovery in the Houzhai karst basin, southwest China, *Hydrological Processes*,  
 469 28, 2082-2090, doi: 10.1002/hyp.9761, 2014.  
 470 Yan, J. ,Wang, Y. P. ,Zhou, G. ,Li, S. ,Yu, G. and Li, K.: Carbon uptake by karsts in the Houzhai Basin,  
 471 southwest China, *Journal of Geophysical Research*, 116, doi: 10.1029/2011JG001686, 2011.  
 472 Yu, S. ,Du, W. ,Sun, P. and Huang, J.: Study on Chemical Characteristics, Carbon Flux and Influencing  
 473 Factors of Typical Rivers in Subtropics, *Journal of China Hydrology*, 35, 33-41, 2015.  
 474 Zeng, C. ,Liu, Z. ,Yang, J. and Yang, R.: A groundwater conceptual model and karst-related carbon  
 475 sink for a glacierized alpine karst aquifer, Southwestern China, *Journal of Hydrology*, 529, 120-133,  
 476 doi: 10.1016/j.jhydrol.2015.07.027, 2015.



- Zhang, C.: Carbonate rock dissolution rates in different landuses and their carbon sink effect., chinese science bulletin, 56, 2174-2180, doi: 10.1007/s11434-011-4404-4, 2011.
- Zhang, C.: Carbonate rock dissolution rates in different landuses and their carbon sink effect, Chinese Science Bulletin, 56, 2174-2180, doi: 10.1007/s11434-011-4404-4, 2011.
- Zhang, L. ,Qin, X. ,Liu, P. ,Huang, Q. ,Lan, F. and Ji, H.: Estimation of carbon sink fluxes in the Pearl River basin (China) based on a water – rock – gas – organism interaction model, Environmental Earth Sciences, 74, 945-952, doi: 10.1007/s12665-014-3788-2, 2015.
- Zhao, M. ,Zeng, C. ,Liu, Z. and Wang, S.: Effect of different land use/land cover on karst hydrogeochemistry: A paired catchment study of Chenqi and Dengzhanhe, Puding, Guizhou, SW China, Journal of Hydrology, 388, 121-130, doi: 10.1016/j.jhydrol.2010.04.034, 2010.
- Zhao, M. ,Zeng, C. ,Liu, Z. and Wang, S.: Effect of different land use/land cover on karst hydrogeochemistry: A paired catchment study of Chenqi and Dengzhanhe, Puding, Guizhou, SW China, Journal of Hydrology, 388, 121-130, doi: 10.1016/j.jhydrol.2010.04.034, 2010.
