# Supplementary material for: Differences and influencing factors for underground water carbon uptake by karsts in Houzhai Basin, southwest China
Source: Copernicus journal article supplement (doi:10.5194/se-2016-37), 2016-03-10
Supplement: Supplementary file [file se-2016-37-AC2-supplement.zip]

# Certificate of English Language Editing

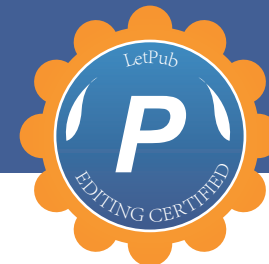

## Manuscript Title:

Differences and influencing factors related to underground water carbon uptake by karsts in the Houzhai Basin, southwestern China

## Date Issued:

May 3, 2016

This document certifies that the manuscript listed above was copy edited for proper English language related to grammar, syntax, word choice, and sentence construction by Accdon. LetPub is the flagship professional editing brand of Accdon. All of our language editors are native English speakers with long-term experience in editing scientific and technical manuscripts. They are committed to leveling the playing field for researchers whose native language is not English.

- This certificate confirms that copy editing of the manuscript has been performed; however, it does not confirm the quality of the scientific or technical content unless otherwise stated. Neither the research content nor the authors' intended meaning were altered in any way during the editing process.
- Documents receiving this certification should be considered ready for publication where language issues are concerned. However, the authors may accept or reject Accdon's suggestions and changes at their own discretion.

Note: Accdon cannot guarantee the language editing quality for manuscripts that have been altered by the author after our copy editing service has been performed.

- If you have any questions or concerns about this edited document, please contact Accdon at [support@letpub.com](mailto:support@letpub.com)
