# Supplementary material for: Differences and influencing factors for underground water carbon uptake by karsts in Houzhai Basin, southwest China
Source: Copernicus journal article supplement (doi:10.5194/se-2016-37), 2016-03-10
Supplement: Supplementary file [file se-2016-37-RC2-supplement.pdf]

***Interactive comment on “Differences and influencing factors for underground water carbon uptake by karsts in Houzhai Basin, southwest China” by Junyi Zhang et al.***

In this manuscript, authors analysis the influencing factors of chemical weathering and flow on karst carbon sink. The author accumulated a large amount of data, which is reliably for the discussion. This study has a certain guiding significance for carbon sink research. However, there are some erros listd as follow that should be corrected. After they are modified, I think this mansucript can be published.

- (1) Runoff and chemical weathering were considered in this article, but what about the temperature, plants, aquatic organism, etc. At least, the factors should be explained in the introduction section.
- (2) Flow and ion concentration change and its effects on carbon sink, but hydrodynamic condition that control the cantact time of water-rock, may have more important influence on the carbon sink. So the results of the article should be deep analysis.
- (3) The quality of the ms is poor in English express. I strongly suggest the authors to polish the English. There are many professional editing services.
